# Supplementary material for: Small RNA Analyses of a Ceratobasidium Isolate Infected with Three Endornaviruses
Source: MDPI journal article supplement (doi:10.3390/v14102276), 2022-10-17
Supplement: s1 [file s1]

**Table S2.** Ten Ascomycota fungal genomes with high-quality genome annotations were chosen to annotate the *Ceratobasidium* sp. C02 assembly

| Genome                       | Accession       | Reference                                                                                           | Source | Evidence                                                                                    |
|------------------------------|-----------------|-----------------------------------------------------------------------------------------------------|--------|---------------------------------------------------------------------------------------------|
| <i>Laccaria bicolor</i>      | Lacbi2 (16097)  | <a href="https://doi.org/10.1038/nature06556">https://doi.org/10.1038/nature06556</a>               | JGI    | <i>ab initio</i><br>38,913 ESTs<br>protein homology - UniProtKB fungi                       |
| <i>Mycena indigotica</i>     | GCF_014461135.1 | <a href="https://doi.org/10.1073/pnas.2010761117">https://doi.org/10.1073/pnas.2010761117</a>       | NCBI   | <i>ab initio</i><br>RNA sequencing<br>protein homology - UniProtKB fungi                    |
| <i>Coprinopsis cinerea</i>   | Copci1          | <a href="https://doi.org/10.1073/pnas.1003391107">https://doi.org/10.1073/pnas.1003391107</a>       | JGI    | <i>ab initio</i><br>5,612 ESTs                                                              |
| <i>Schizophyllum commune</i> | Schco3          | <a href="https://doi.org/10.1038/nbt.1643">https://doi.org/10.1038/nbt.1643</a>                     | JGI    | <i>ab initio</i><br>31,000 ESTs                                                             |
| <i>Sparassis crispa</i>      | GCF_003851025.1 | <a href="https://doi.org/10.1038/s41598-018-34415-6">https://doi.org/10.1038/s41598-018-34415-6</a> | NCBI   | <i>ab initio</i><br>RNA sequencing                                                          |
| <i>Serpula lacrymans</i>     | SerlaS7_9_2     | <a href="https://doi.org/10.1126/science.1205411">https://doi.org/10.1126/science.1205411</a>       | JGI    | <i>ab initio</i><br>undisclosed ESTs<br>protein homology - GenBank nr proteins              |
| <i>Postia placenta</i>       | Pospl1          | <a href="https://doi.org/10.1073/pnas.0809575106">https://doi.org/10.1073/pnas.0809575106</a>       | JGI    | <i>ab initio</i><br>44,520 ESTs<br>protein homology - 'reliable homology-based gene models' |

|                                                      |             |                                                                                               |     |                                                                           |
|------------------------------------------------------|-------------|-----------------------------------------------------------------------------------------------|-----|---------------------------------------------------------------------------|
| <i>Dichomitus<br/>squalens</i>                       | Dicsqu463_1 | <a href="https://doi.org/10.1128/MRA.00264-19">https://doi.org/10.1128/MRA.00264-19</a>       | JGI | <i>ab initio</i><br>RNA sequencing<br>protein homology - 'homology-based' |
| <i>Agaricus<br/>bisporus</i> var.<br><i>bisporus</i> | 99190       | <a href="https://doi.org/10.1073/pnas.1206847109">https://doi.org/10.1073/pnas.1206847109</a> | JGI | <i>ab initio</i><br>79,271 ESTs<br>protein homology - GenBank nr proteins |

---
