# Supplementary material for: Small RNA Analyses of a Ceratobasidium Isolate Infected with Three Endornaviruses
Source: MDPI journal article supplement (doi:10.3390/v14102276), 2022-10-17
Supplement: s1 [file s1]

**Table S5.** Gene ontology terms analysis of the predicted gene targets of up-regulated Cer-miRNAs identified in *Ceratobasidium* sp. when infected with three endornaviruses: Ceratobasidium endornavirus B, Ceratobasidium endornavirus C and Ceratobasidium endornavirus D

| Function           | Term ID    | Name                                        |
|--------------------|------------|---------------------------------------------|
| Biological process | GO:0006355 | "regulation of transcription                |
|                    | GO:1902600 | "proton transmembrane transport"            |
|                    | GO:0032508 | "DNA duplex unwinding"                      |
|                    | GO:0006468 | "protein phosphorylation"                   |
|                    | GO:0005975 | "carbohydrate metabolic process"            |
|                    | GO:0006351 | "transcription                              |
|                    | GO:0006281 | "DNA repair"                                |
|                    | GO:0000723 | "telomere maintenance"                      |
| Cellular component | GO:0033179 | "proton-transporting V-type ATPase          |
| Molecular function | GO:0000981 | "DNA-binding transcription factor activity  |
|                    | GO:0005515 | "protein binding"                           |
|                    | GO:0015078 | "proton transmembrane transporter activity" |
|                    | GO:0016837 | "carbon-oxygen lyase activity               |
|                    | GO:0003678 | "DNA helicase activity"                     |
|                    | GO:0047834 | "D-threo-aldose 1-dehydrogenase activity"   |
|                    | GO:0004672 | "protein kinase activity"                   |
|                    | GO:0046983 | "protein dimerization activity"             |
|                    | GO:0020037 | "heme binding"                              |
|                    | GO:0005506 | "iron ion binding"                          |
|                    | GO:0008270 | "zinc ion binding"                          |
|                    | GO:0003677 | "DNA binding"                               |
|                    | GO:0005524 | "ATP binding"                               |
|                    | GO:0016705 | "oxidoreductase activity                    |
