# Supplementary material for: Small RNA Analyses of a Ceratobasidium Isolate Infected with Three Endornaviruses
Source: MDPI journal article supplement (doi:10.3390/v14102276), 2022-10-17
Supplement: s1 [file s1]

**Table S1.** List of virus-specific primers used to identify *Ceratobasidium* endornavirus B (CbEVB), *Ceratobasidium* endornavirus C (CbEVC) and *Ceratobasidium* endornavirus D (CbEVD) in *Ceratobasidium* sp. lines. Primers were designed to amplify a region in the RNA-dependent RNA polymerase (RdRp) gene (Ong, Li et al. 2016).

| <b>Mycovirus<sup>a</sup></b> | <b>Primer name</b> | <b>Primer sequence (5' – 3')</b> | <b>Expected amplicon length</b> |
|------------------------------|--------------------|----------------------------------|---------------------------------|
| CbEVB                        | EVB-RdRP-F         | CCAATGCGTAGCAGACCTGT             | 918bp                           |
|                              | EVB-RdRP-R         | GTTTCCGCACTTGATTVVAT             |                                 |
| CbEVC                        | EVC-RdRP-F         | GCAATGAGGAGGCAGAAGAG             | 809bp                           |
|                              | EVC-RdRP-R         | GCCAACATGCGAAGGAATAC             |                                 |
| CbEVD                        | EVD-RdRP-F         | AGATTTCAGAGAAGCGTGGTT            | 631bp                           |
|                              | EVD-RdRP-R         | AGCGTGGATGATAAGGTTGG             |                                 |

<sup>a</sup> CbEVB, *Ceratobasidium* endornavirus B; CbEVC, *Ceratobasidium* endornavirus C and CbEVD, *Ceratobasidium* endornavirus D
